# Supplementary material for: An ancient yet flexible cis-regulatory architecture allows localized Hedgehog tuning by patched/Ptch1
Source: eLife. 2016 May 5;5:e13550. doi: 10.7554/eLife.13550 (PMC4887206; doi:10.7554/eLife.13550)
Supplement: Figure 2—source data 1. — The promoter analysis primers A_F and B_F contain a 5’ tag of CACCctcgag – CACC is used to facilitate TOPO cloning (Life Technologies; see Materials and methods) for ease of sequencing, and a XhoI site (ctcgag) for cloning purposes. The A_R primer contains a 5’ tag of GTAaccggt. The GTA serves as a buffer for ease of restriction digest and an AgeI restriction site (accggt) for cloning purposes. The B_R primer contains a 5’ tag of GTActcgag. The GTA serves as a buffer for ease of restriction digest and a XhoI restriction site (ctcgag) for bidirectional cloning purposes. All other primers were designed for TOPO cloning of enhancer sequences: Each enhancer’s forward primer contains a 5’ tag of CACCCCGCGG. CACC was used for TOPO cloning while CCGCGG is a SacII restriction site for screening purposes. Each Reverse primer contains a 5’ tag of GTACCGCGG, the GTA again serves as a buffer for ease of restriction digest and a SacII restriction site (CCGCGG) was used for cloning purposes. DOI: http://dx.doi.org/10.7554/eLife.13550.004 [file elife-13550-fig2-data1.xlsx]

## Sheet: Sheet1
Primer	Sequence	Restriction Site
A_F	CACCctcgagCTCGCCTAATGAAGTTGTTGGC	XhoI
A_R	GTAaccggtGTTCTGTGATATCTATCTTGT	AgeI
B_F	CACCctcgagAACAAACTTGGTATTTTCTCGG	XhoI
B_R	GTActcgagCGCGCGCCGCTGTTTCTC	XhoI
GC_F	CACCGGCGCGCCCTATGGGCCAATGACAAATG	AscI
GC_R	GTACCGCGGGGGTGATTCAGGAGTTTTTCC	SacII
HF_F	CACCGGCGCGCCTCCCACTTCATAACCCTC	AscI
HF_R	GTACCGCGGCGCTCTCTCTTTCGGGGAGAA	SacII
JH_F	CACCGGCGCGCCTACGTACTCTTATTACTCCACTC	AscI
JH_R	GTACCGCGGGCTATTGCATTTGTCATTGGC	SacII
LJ_F	CACCGGCGCGCCCTACTTGGTTTGATAAAT	AscI
LK_R	GTACCGCGGACGGTGTGTGTGAACCCAACTAATTG	SacII
LJ_R	GTACCGCGGATAAGTACAGTGCTGGTCATA	SacII
ML_F	CACCGGCGCGCCCGAGGCGAGATGGCTTCG	AscI
ML_R	GTACCGCGGGCAGCGACTGCTGAGCCAGTC	SacII
NM_F	CACCGGCGCGCCTACAATATCTATTATCTA	AscI
NM_R	GTACCGCGGAGTTCCCATTCAGCTTTGACA	SacII
PN_F	CACCGGCGCGCCCGCCAAAATGAAAATTATTACAAAG	AscI
PN_R	GTACCGCGGCGTCCCTCTGTCGTCGCTGGG	SacII
RP_F	CACCGGCGCGCCAGCATTAACAGCCGAAGC	AscI
RP_R	GTACCGCGGACCGAGCCGTACAAATATAAC	SacII
VR_F	CACCGGCGCGCCACAGACGGGGCTACACTGAG	AscI
VR_R	GTACCGCGGATTCGGAGACATTCGCAGAC	SacII
VT_R	GTACCGCGGGACAGACCCCGAAGACTGAG	SacII
YU_F	CACCGGCGCGCCGCCCTGTCGTCTTTGTCTTC	AscI
YX_R	GTACCGCGGGTATTAATAGTGGGAGCTCTG	SacII
YV_R	GTACCGCGGAAATTTGCATAATAATAAGTC	SacII
WV_F	CACCGGCGCGCCTACAATTTTGGAAAAGG	AscI
U_F	CACCGGCGCGCCTCGCTGCGTGTTGCTGTG	AscI
YU_R	GTACCGCGGAACCATCAAACCCACGAAAC	SacII
ZY_F	CACCGGCGCGCCCCGGATCGACCTAGGTAAGG	AscI
ZY_R	GTACCGCGGTTCTTCTGGGTGTGTGCTTG	SacII
VT_F	CACCGGCGCGCCCCGCATACCCTATGATATGACTC	AscI
DB_F	CACCGGCGCGCCATGCATGCGCAGCCTGCCAC	AscI
DB_R	GTACCGCGGCGCGCGCCGCTGTTTCTC	SacII
1AC_F	CACCGGCGCGCCGGTGAGTGCCCAACTACAG	AscI
1AC_R	GTACCGCGGGTTGGGCGCCATATGTTTAC	SacII
1BC_F	CACCGGCGCGCCTCCGTCCAGCAGTCGAAAG	AscI
1BC_R	GTACCGCGGCCCATTCGATATACCCTCAAG	SacII
1CE_F	CACCGGCGCGCCTCGGTTGTAACGTGCTTTTG	AscI
1CE_R	GTACCGCGGTGCAGATGGCAGATCAAGTC	SacII
1EH_F	CACCGGCGCGCCGAAGTGCTTAACAAGTTAAC	AscI
1EH_R	GTACCGCGGCACGACAACCAATGAGATCG	SacII
1GH_F	CACCGGCGCGCCGGTAATAAATGCGGCAGACG	AscI
1HI_F	CACCGGCGCGCCGATTGATTGATGCGTGATGC	AscI
1HI_R	GTACCGCGGCTGAAAAATGCAACAAAATA	SacII
