# Supplementary material for: An ancient yet flexible cis-regulatory architecture allows localized Hedgehog tuning by patched/Ptch1
Source: eLife. 2016 May 5;5:e13550. doi: 10.7554/eLife.13550 (PMC4887206; doi:10.7554/eLife.13550)
Supplement: Figure 3—source data 1. — The top strand of each double stranded oligonucleotide is shown. The GBS being tested is marked in bold. DOI: http://dx.doi.org/10.7554/eLife.13550.007 [file elife-13550-fig3-data1.xlsx]

## Sheet: Sheet1
Primer	Sequence
LK_93	AATCGTGCTCTGCCACCCACTCACACTTG
LK_93ko	AATCGTGCTCTGCAAAACACTCACACTTG
LK_47	AAGTGGACGAGGCCACCAAATGACAACAC
LK_47ko	AAGTGGACGAGACAAAAAAATGACAACAC
VT_93	AATGGCATGTTGCCACCCAAGTTGCCAGT
VT_93ko	AATGGCATGTTGCAAAACAAGTTGCCAGT
VT_93hi	AATGGCATGTGACCACCCAAGTTGCCAGT
VT_141	AGTTGCCAGTTGGCTGGCCAAGACTTAAT
VT_141ko	AGTTGCCAGTTGTTTTGCCAAGACTTAAT
VT_141hi	AGTTGCCAGTTGGGTGGTCAAGACTTAAT
1EH_82	GCGGCATAACTGGGTGCGCTCATATTTAA
1EH_82ko	GCGGCATAACTGTTTTCGCTCATATTTAA
1EH_82hi	GCGGCATAACTGGGTGGTCTCATATTTAA
1EH_22	TCAGGCGCTGTGGGGGGCCGGAGAAAATT
1EH_22ko	TCAGGCGCTGTGTTGTGCCGGAGAAAATT
1EH_22hi	TCAGGCGCTGTGGGTGGTCGGAGAAAATT
DB_1	TTGGGTAGGGGACCACCCACATCGCTTGG
DB_1KO	TTGGGTAGGGGACAAAACACATCGCTTGG
DB_2	CTGCAGTGTGGACCACCCAAAAATAAATT
DB_3	TTTTTGCATGGACCACCCAAAGTGCCTTG
ZY_1	TCGAATTAAGGGCCACCCACGAAGAGACA
ZY_1KO	TCGAATTAAGGGCAAAACACGAAGAGACA
ZY_2	GGCTAATATGGACCACCCAAGAAGATGAC
ZY_2KO	GGCTAATATGGACAAAACAAGAAGATGAC
ZY_3	CACACACGTCGATCGCCCAGGAGCGCTGG
ZY_3KO	CACACACGTCGATAGAACAGGAGCGCTGG
ZY_4	GGATGTGGAGGGCCACACACGTCGATCGC
ZY_4KO	GGATGTGGAGGGCAAAACACGTCGATCGC
