# Supplementary material for: An ancient yet flexible cis-regulatory architecture allows localized Hedgehog tuning by patched/Ptch1
Source: eLife. 2016 May 5;5:e13550. doi: 10.7554/eLife.13550 (PMC4887206; doi:10.7554/eLife.13550)
Supplement: Figure 5—source data 1. — Consensus motifs were obtained from the CIS-BP database (Weirauch et al., 2014). Enhancer nomenclature is given in Figure 2A. IUPAC naming is used in the 'Consensus Binding Motif' colu mn (R = A/G; Y = C/T; S = G/C; W = A/T; K = G/T; M = A/C; B = C/G/T; D = A/G/T; H = A/C/T; V = A/C/G; N = A/C/G/T). DOI: http://dx.doi.org/10.7554/eLife.13550.014 [file elife-13550-fig5-data1.xlsx]

## Sheet: Sheet1
Enhancer	Transcription Factor	TF Family/Homologs	Consensus Binding Motif
ZY	Distaless (Dll)	DLX	TRATWDB
ZY	Tango/Spineless (Tgo/Ss)	bHLH-PAS/Arnt	RTCASRCR
YU	Scalloped (Sd)	TEAD	DGHATNT
YU	Engrailed (En)	En	YTAATKR
VT	Odd-Skipped (Odd)	Osr	SRGTAGC
VT	Engrailed (En)	En	YTAATKR
RP	Forkhead (Fkh)	Forkhead/FOXA	TRDDYAAACA
RP	Engrailed (En)	En	YTAATKR
PN	Pannier (Pnr)/dGATAa	GATA	WGATAA
LK	Sloppy Paired (Slp1)	Forkhead/FOXG	RWAAAYA
JB	GAGA Factor/Trl (GAF)	Trithorax	GAGAG
JB	Scalloped (Sd)	TEAD	DGHATNT
JB	Engrailed (En)	En	YTAATKR
1EH	GAGA Factor/Trl (GAF)	Trithorax	GAGAG
1EH	Pleiohomeotic (Pho)	YY1	GCCAT
1EH	Engrailed (En)	En	YTAATKR
B	GAGA Factor/Trl (GAF)	Trithorax	GAGAG
B	Pleiohomeotic (Pho)	YY1	GCCAT
