# Supplementary material for: An ancient yet flexible cis-regulatory architecture allows localized Hedgehog tuning by patched/Ptch1
Source: eLife. 2016 May 5;5:e13550. doi: 10.7554/eLife.13550 (PMC4887206; doi:10.7554/eLife.13550)
Supplement: Figure 6—source data 1. — Sequence coordinates, corresponding to the mm9 build of the Mus musculus genome, are provided for all enhancers tested as lacZ reporters in E10.5 mouse embryos in Figure 6A. Enhancers are named for their position relative to the Ptch1 promoter. References are provided for previously published enhancers. DOI: http://dx.doi.org/10.7554/eLife.13550.019 [file elife-13550-fig6-data1.xlsx]

## Sheet: Sheet1
Enhancer location (relative to Ptch1 promoter)	Coordinates (mm9)	Source
-456kb	chr13:64122052-64122757	this study
-438kb	chr13:64104376-64104670	this study
-415kb	chr13:64081569-64081954	this study
-154kb	chr13:63820845-63821332	this study
-8.1kb	chr13:63674651-63674885	this study
-3.7kb	chr13:63670185-63671020	this study
-0.95kb	chr13:63667602-63667781	Vokes et al., 2007
+2.6kb	chr13:63664151-63664519	this study
+11kb	chr13:63655468-63657042	Visel et al., 2007
+45kb	chr13:63621577-63634154	Lopez-Rios et al., 2014
