# Supplementary material for: Computed tomography of replica carbon
Source: eLife journal article supplement (doi:10.7554/elife.13550), 1991-04-01
Supplement: supp [file elife-13550-supp-v1.zip]

chr2R:8,647,255-8,650,618 (dm6)

chr2R:

8,647,500 |

8,648,000 |

1 kb |  
8,648,500 |

8,649,000 |

8,649,500 |

8,650,000 |

8,650,500 |

Grh (MYKDYTBVNH)

Zeste (YGAGYG)

Dsp1 (GAAAA)

Adf1 (MGRIYGCR)

Pho/PBE (CRGCCATYDTRGD)

Trl/GAF (GAGAG)

Engrailed (YTAATKR)

Inr (YYANWYY)

Pause Button (KCGRWCG)

DPE (RGWYVT)

CI (GACCACCA)

*ptc*

fragment B

fragment A

(core promoter)

27 insects  
conservation  
by PhastCons

1

0
