# Supplementary material for: Computed tomography of replica carbon
Source: eLife journal article supplement (doi:10.7554/elife.13550), 1991-04-01

**A**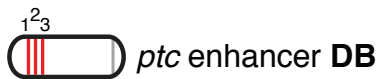

DB site 1:  
GACCACCCA

DB site 2:  
GACCACCCA

DB site 3:  
GACCACCCA

DB site 1-KO

0x  
1000x

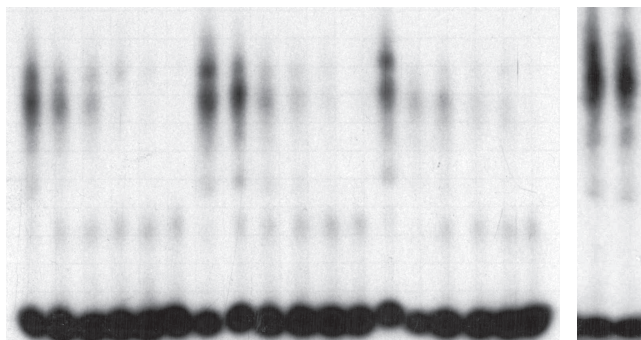**B**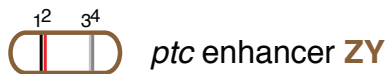

ZY site 1:  
GgCCACCCA

ZY site 2:  
GgCCACCCA

ZY site 3:  
GAtCgCCCA

ZY site 4:  
GgCCACaCA

ZY sites-KO

| 1  |       | 2  |       | 3  |       | 4  |       |
|----|-------|----|-------|----|-------|----|-------|
| 0x | 1000x | 0x | 1000x | 0x | 1000x | 0x | 1000x |

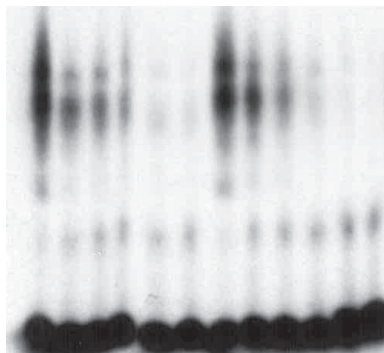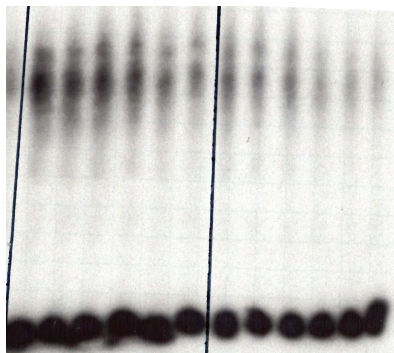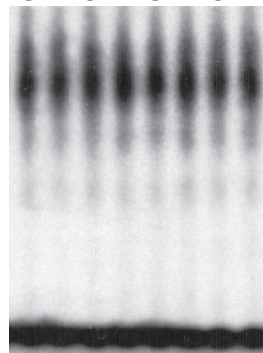

Supplement: supp [file elife-13550-supp-v1.zip]
