# Supplementary figures and images for: Computed tomography of replica carbon
Source: eLife journal article supplement (doi:10.7554/elife.13550), 1991-04-01

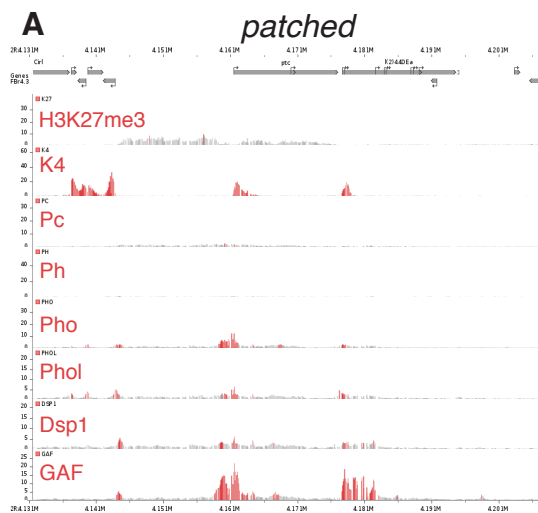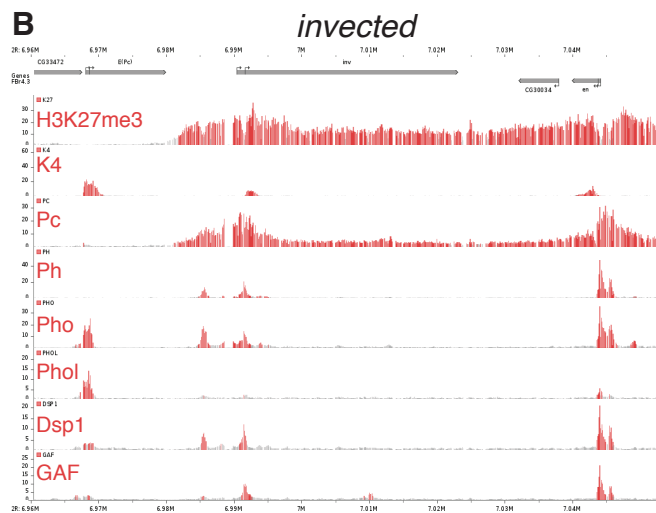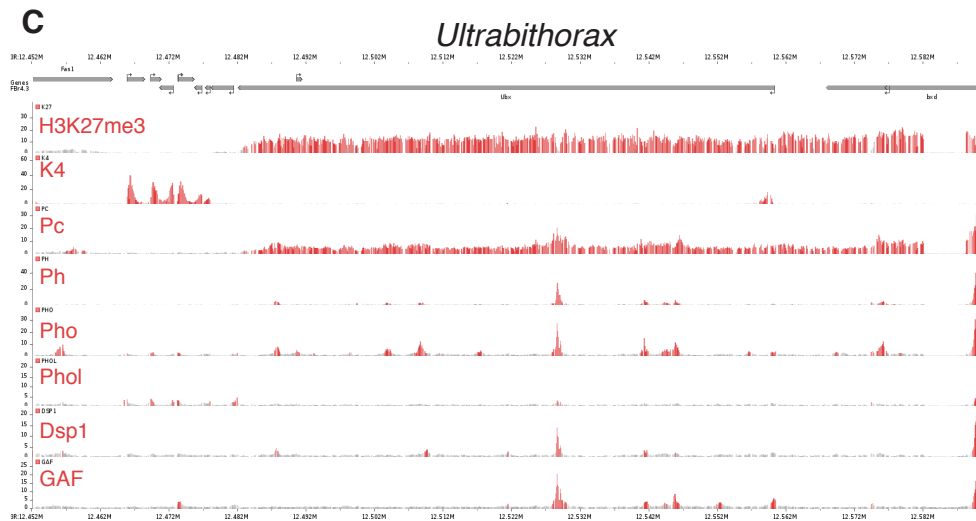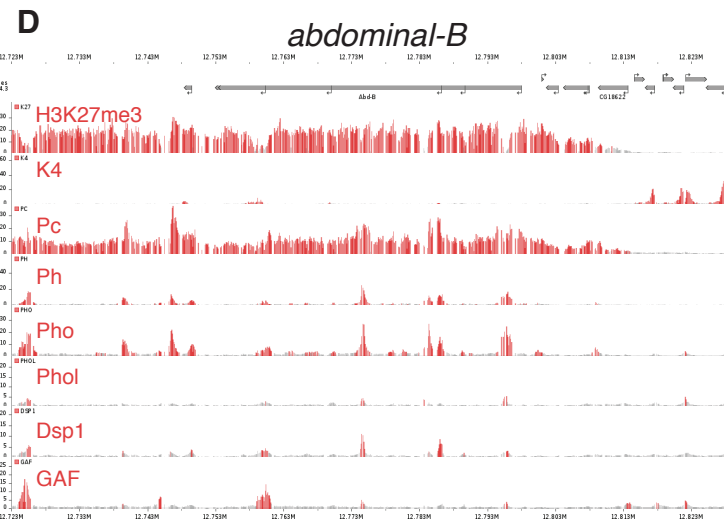

Supplement: supp [file elife-13550-supp-v1.zip]

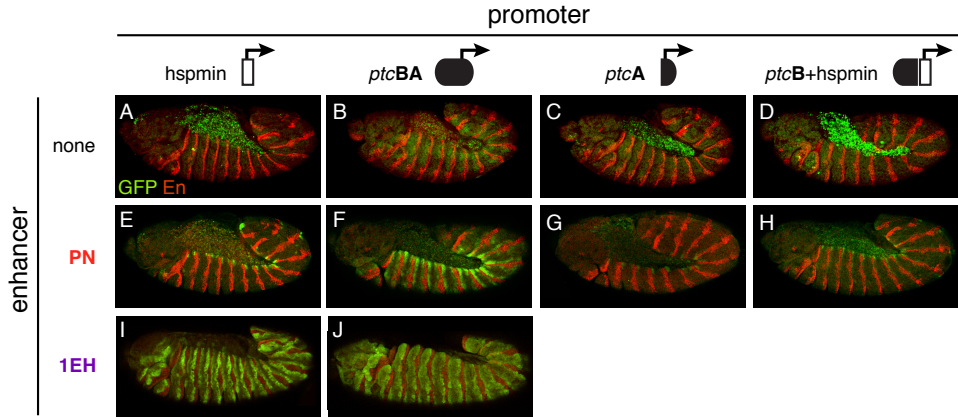

Supplement: supp [file elife-13550-supp-v1.zip]

**A**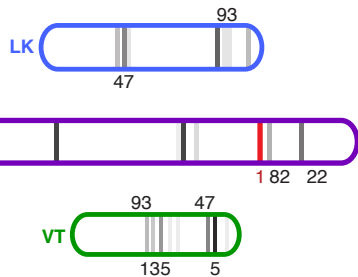**B**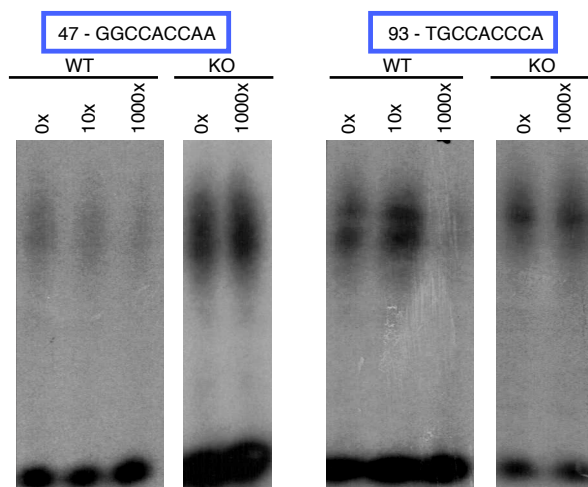**C**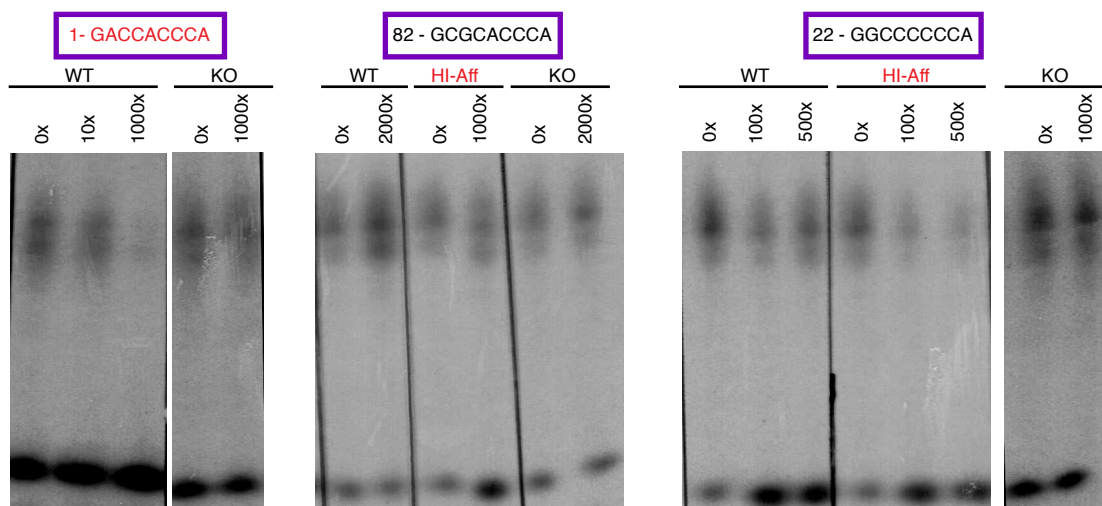**D**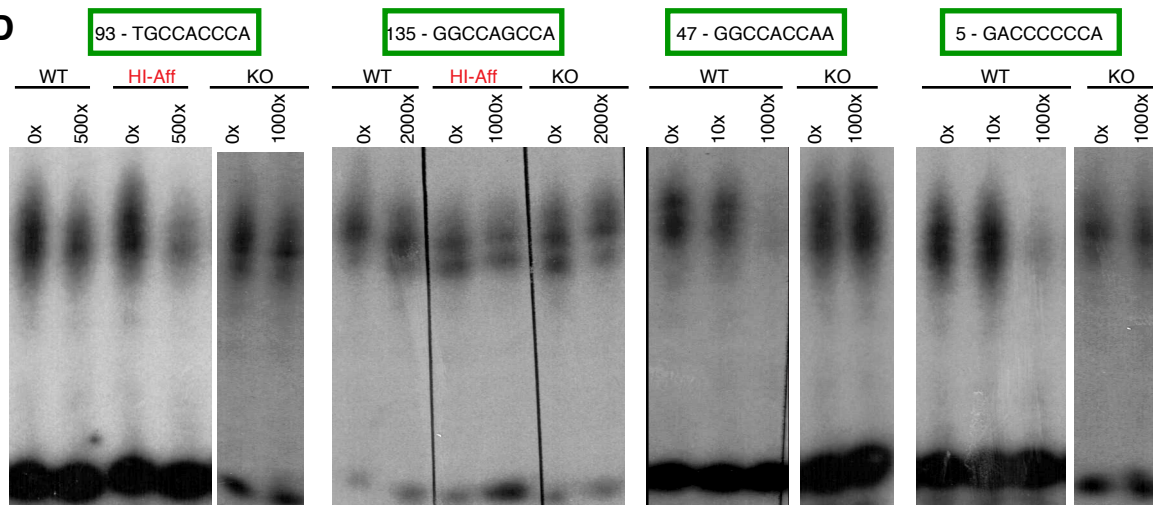

Supplement: supp [file elife-13550-supp-v1.zip]

**A** - heat shock

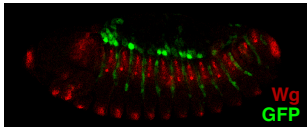

**B** + heat shock

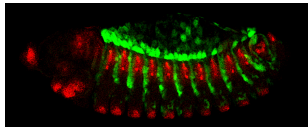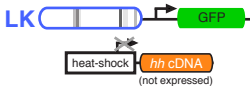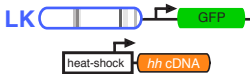

Supplement: supp [file elife-13550-supp-v1.zip]

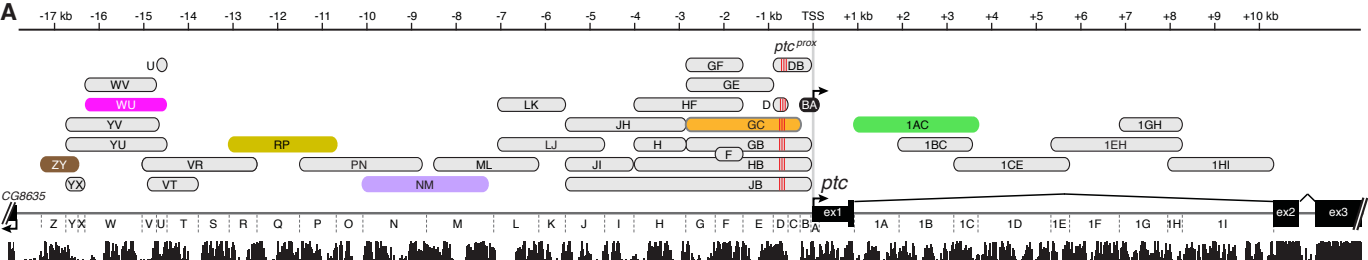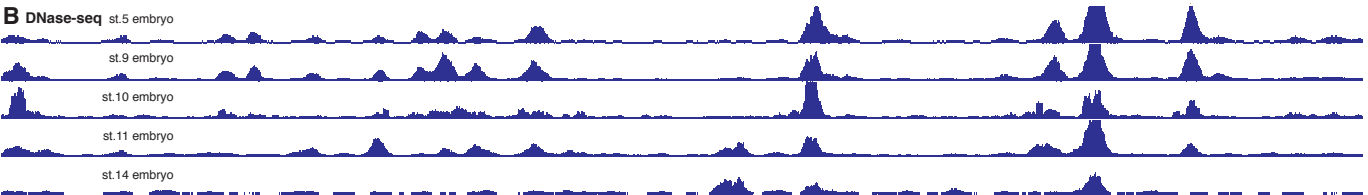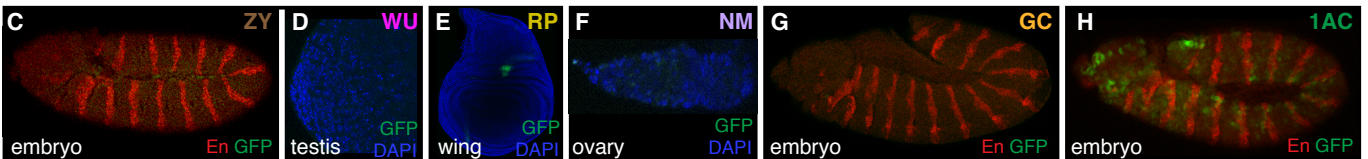

Supplement: supp [file elife-13550-supp-v1.zip]

**A**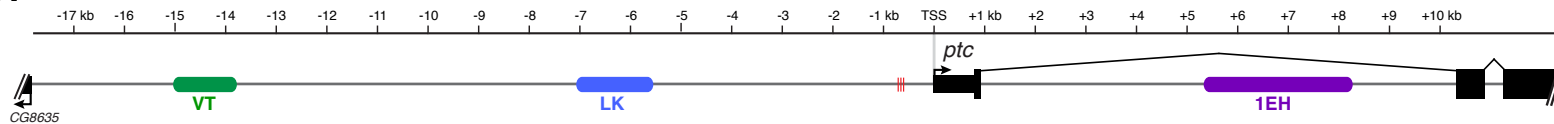**B**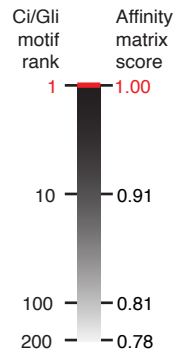**C**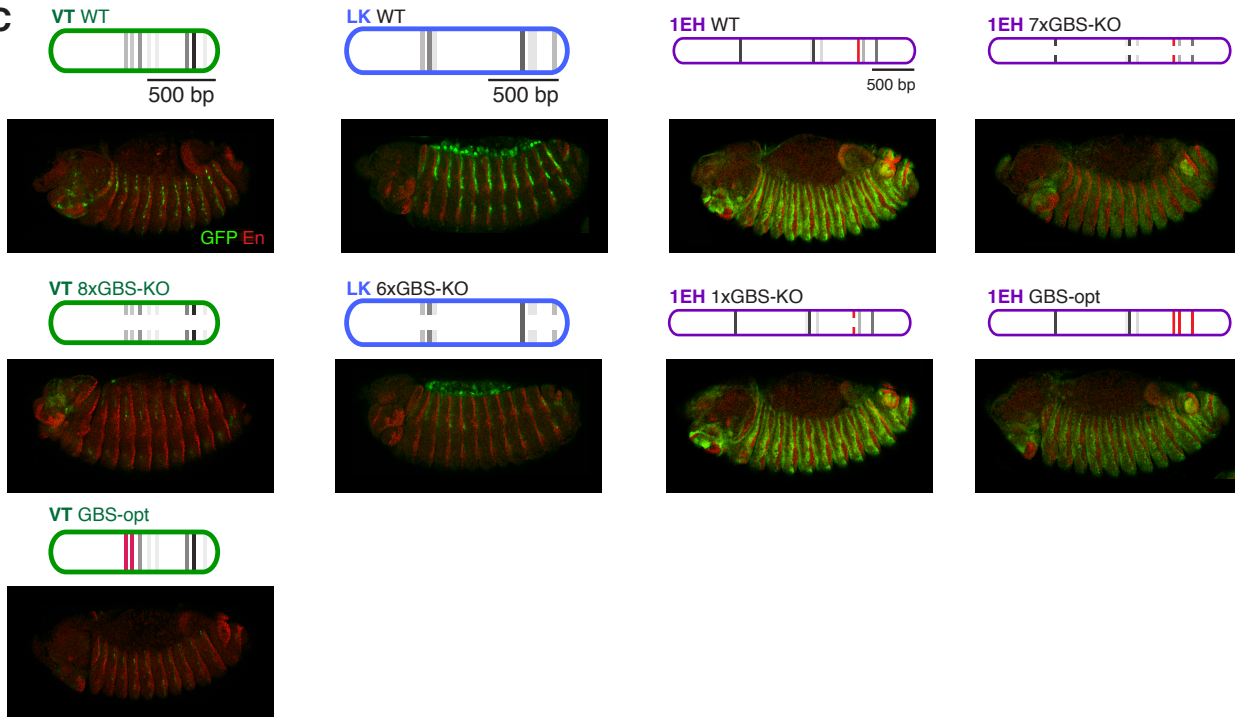

Supplement: supp [file elife-13550-supp-v1.zip]
